# Supplementary material for: Hydrogen production by the water-gas shift reaction using CuNi/Fe2O3 catalyst
Source: Royal Society of Chemistry journal article supplement (doi:10.1039/c5cy00173k), 2015-01-01
Supplement: c5cy00173k1.pdf [file c5cy00173k1.pdf]

**Supporting Information**

**Hydrogen Production by the Water-Gas Shift Reaction using CuNi/Fe<sub>2</sub>O<sub>3</sub>  
Catalyst**

Ajay Jha,<sup>a</sup> Dae-Woon Jeong,<sup>a</sup> Jae-Oh Shim,<sup>a</sup> Won-Jun Jang,<sup>a</sup> Yeol-Lim Lee,<sup>a</sup> Chandrashekhara  
V. Rode<sup>b</sup> and Hyun-Seog Roh<sup>\*a</sup>

<sup>a</sup> *Department of Environmental Engineering, Yonsei University, 1 Yonseidae-gil, Wonju,*

*Gangwon 220-710, S. Korea. E-mail: [hsroh@yonsei.ac.kr](mailto:hsroh@yonsei.ac.kr); Fax: +82-33-760-2571*

<sup>b</sup> *Chemical Engineering & Process Development Division, CSIR-National Chemical Laboratory,*

*Pune-411008, India.*

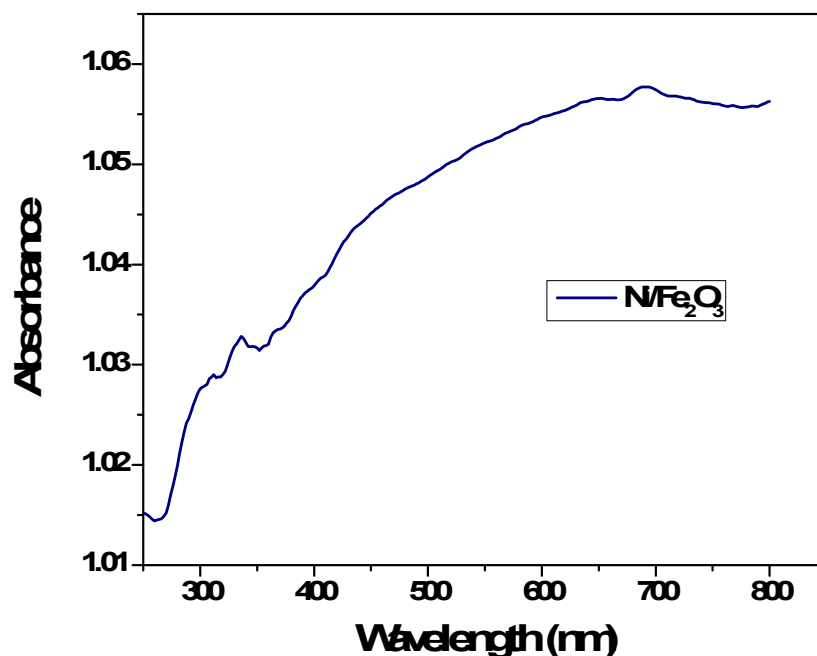

Fig. S1. Diffuse reflectance spectrum of the Ni/Fe<sub>2</sub>O<sub>4</sub> catalyst.

Fig. S1 shows the diffuse reflectance spectrum of the Ni/Fe<sub>2</sub>O<sub>4</sub> catalyst after reduction. It shows two bands; the first in the range of 300-400 nm and the second at ~700 nm. The initial band corresponds to the charge transfer transitions from O<sup>2-</sup> 2p to Fe<sup>3+</sup> 3d-orbitals<sup>1</sup> and the last band was attributed to the NiFe<sub>2</sub>O<sub>4</sub>, which corresponds to the Ni ions in the octahedral sites.<sup>2</sup> This suggests that Ni in the Ni/Fe<sub>2</sub>O<sub>4</sub> catalyst was present in the oxidized form under the reduction conditions used for the reaction not as a metallic phase (Ni<sup>0</sup>).

## References

1. R. Suresh, K. Giribabu, R. Manigandan, A. Stephen and V. Narayanan, *RSC Adv.*, 2014, **4**, 17146.

2. S. Balaji, R. K. Selvan, L. J. Berchmans, S. Angappan, K. Subramanian, C. O. Augustin,  
*Mater. Sci. Eng. B*, 2005, **119**, 119.
